# Supplementary material for: Major latex protein-like protein 43 (MLP43) functions as a positive regulator during abscisic acid responses and confers drought tolerance in Arabidopsis thaliana
Source: PubMed Central journal article supplement (PMC4682443; doi:10.1093/jxb/erv477), 2015-10-27
Supplement: supp_erv477_Supplementary_tables_S1_S5.pdf [file supp_erv477_Supplementary_tables_S1_S5.pdf]

## Supplementary Tables

**Table S1**

---

**Table S1. The primers used for identification of *mlp43* mutant (Salk\_109337 and Salk\_033347).**

---

|           |                               |
|-----------|-------------------------------|
| LBb1.3    | 5'-ATTTTGCCGATTTTCGGAAC-3'    |
| 109337-RP | 5'-ACTTTCCATCTGCACCATTTG-3'   |
| 109337-LP | 5'-ACATCACGGTCGATCTTAACG-3'   |
| 033347-RP | 5'-TTGGAAAAGTAAGCAATGGTCTC-3' |
| 033347-LP | 5'-CTTGGAGTGTAATGCGAAGC-3'    |

---

**Table S2****Table S2. The detail information of plasmids construction in this study.**

| <b>Plasmids Names</b> | <b>Cloning Sites</b> | <b>Vectors</b> | <b>References</b> |
|-----------------------|----------------------|----------------|-------------------|
| Pro35S::MLP43-GFP     | XhoI/KpnI            | pGFP           |                   |
| pBA-MLP43-GFP         | XhoI/SacI            | pBA            |                   |
| ProMLP43::GUS         | XbaI/XmaI            | pBI101.1       |                   |
| AD-MLP43              | EcoRI/SacI           | pGADT          | Clontech          |
| BD-MLP43              | EcoRI/PstI           | pGBKT          | Clontech          |
| BD-MLP34              | NcoI/EcoRI           | pGBKT          | Clontech          |
| BD-MLP168             | NcoI/EcoRI           | pGBKT          | Clontech          |
| AD-PYL1               | ClaI/SacI            | pGADT          | Clontech          |
| AD-PYL2               | EcoRI/ClaI           | pGADT          | Clontech          |
| AD-PYL5               | EcoRI/ClaI           | pGADT          | Clontech          |
| AD-PYL9               | EcoRI/ClaI           | pGADT          | Clontech          |
| AD-PYL13              | ClaI/SacI            | pGADT          | Clontech          |
| AD-ABI1               | BamHI/XhoI           | pGADT          | Clontech          |
| AD-ABI5               | EcoRI/XhoI           | pGADT          | Clontech          |
| AD-ABI5S42A           | EcoRI/XhoI           | pGADT          | Clontech          |
| AD-ABI5S42AS145AT201A | EcoRI/XhoI           | pGADT          | Clontech          |
| AD-SnRK2.2            | EcoRI/XhoI           | pGADT          | Clontech          |
| AD-SnRK2.3            | EcoRI/XhoI           | pGADT          | Clontech          |
| BD-SnRK2.6            | NcoI/EcoRI           | pGBKT          | Clontech          |
| BD-SnRK2.8            | EcoRI/XmaI           | pGBKT          | Clontech          |
| BD-SnRK2.10           | EcoRI/XmaI           | pGBKT          | Clontech          |
| BD-PYR1               | EcoRI/PstI           | pGBKT          | Clontech          |
| BD-ABF1               | BamHI/SalI           | pGBKT          | Clontech          |
| BD-ABF3               | BamHI/SalI           | pGBKT          | Clontech          |

**Table S3****Table S3. The primers used for plasmids construction.**

|                   |                                                                                             |
|-------------------|---------------------------------------------------------------------------------------------|
| Pro35S::MLP43-GFP | F: 5'-GGCTCGAG ATGGCAGAAGCGTCTAGTTTGGTGG-3'<br>R: 5'CCG GGTACCCTCTTCCTCGGCCAAGAGATGTTTCG-3' |
| pBA-MLP43-GFP     | F: 5'-CCGCTCGAGATGGCAGAAGCGTCTAGTTTGGTGG-3'<br>R: 5'-CGAGCTCCTATTCCTCGGCCAAGAGATGTTTCG-3'   |
| ProMLP43::GUS     | F: 5'-GCTCTAGACTCACAAAACCTTGTTCCGGAGG-3'<br>R: 5'-TCCCCCGGGTCGGTAAACATGTGATGGAA-3'          |
| MLP43-AD/BD       | F: 5'-GGAATTCATGGCAGAAGCGTCTAGTTT-3'<br>R: 5'-CGAGCTCCTATTCCTCGGCCAAGAGA-3'                 |
| MLP4343-AD        | R: 5'-AACTGCAGCTATTCCTCGGCCAAGAGA-3'                                                        |
| MLP43-BD          | F: 5'-CATGCCATGGAGATGGTAGAGGCAGAGGTTGA-3'<br>R: 5'-GGGAATTCCTAACCTCAGACAATAG-3'             |
| MLP168-BD         | F: 5'-CATGCCATGGAG ATGGCAAAAACCTGAAGCT-3'<br>R: 5'-GGGAATTCCTATTCCTCGGCCAA-3'               |
| MLP34-BD          | F: 5'-CCATCGATACATGGCGAATTCAGAGTCCTC-3'<br>R: 5'-CGAGCTCTTACCTAACCTGAGAAGAGTT-3'            |
| PYL1-AD           | F: 5'-GGGAATTCATGAGCTCATCCCCGGC-3'<br>R: 5'-CCATCGATTTATTCATCATCATGCATAG-3'                 |
| PYL2-AD           | F: 5'-GGGAATTCATGAGGTCACCGGTGCAA-3'<br>R: 5'-CCATCGATTTATTCATCATCATGCATAG-3'                |
| PYL5-AD           | F: 5'-GGGAATTCATGAGGTCACCGGTGCAA-3'<br>R: 5'-CCATCGATTTATTCATCATCATGCATAG-3'                |
| PYL9-AD           | F: 5'-GGGAATTC ATGATGGACG GCGTTGA-3'<br>R: 5'-CCATCGATTCCTGAGTAATGTCTCTG-3'                 |
| PYL13-AD          | F: 5'-CCATCGATACATGGAAAGTTCTAAGCAAAA-3'<br>R: 5'-CGAGCTCTTACTTCATCATTTTCTTTG-3'             |
| ABI5-AD           | F: 5'-GGAATTCATGGTAACTAGAGAAACGAA-3'<br>R: 5'-CCGCTCGAGTTAGAGTGGACAACCTCGGGTT-3'            |
| ABI1-AD           | F: 5'-CGGGATCCGTATGGAGGAAGTATCTCCGGC-3'<br>R: 5'-GGCTCGAGTCAGTTCAAGGGTTTGTCTCT-3'           |
| ABF1-BD           | F: 5'-CGGGATCCCGATGGGTACTCACATTGATATC-3'<br>R: 5'-GCGTCGACTCACCTTCTTACCACGGACCG-3'          |
| ABF3-BD           | F: 5'-CGGGATCCCGATGGGGTCTAGATTAACTTC-3'<br>R: 5'-GCGTCGACTGGCTGGCGCAGAGGCTCCAGA-3'          |
| SnRK2.2-AD        | F: 5'-GGAATTCATGGATCCGGCGACTAATTC-3'<br>R: 5'-CCGCTCGAGTCAGAGAGCATAAACTATCT-3'              |
| SnRK2.3-AD        | F: 5'-GGAATTCATGTATCGAGCTCCGGTGAC-3'<br>R: 5'-CCGCTCGAGTTAGAGAGCGTAACTATCTC-3'              |
| SnRK2.6-BD        | F: 5'-CATGCCATGGATGGATCGACCAGCAGTGA-3'<br>R: 5'-GGGAATTCACATTGCGTACACAAT-3'                 |
| SnRK2.8-BD        | F: 5'-GGAATTCATGGAGAGGTACGAAATAGTGAA-3'<br>R: 5'-TCCCCCGGGTCACAAAGGGGAAAGGAGATCA-3'         |
| SnRK2.10-BD       | F: 5'-GGAATTCATGGACAAGTACGAGCTTGTTA-3'<br>R: 5'-TCCCCCGGGTTAACTGACTCGGACTTCTCCCA-3'         |
| PYR1-BD           | F: 5'-GGAATTCATGCCTTCGGAGTTAACACC-3'                                                        |

R: 5'-AACTGCAGTCACGTACCTGAGAACCAC-3'

---

**Table S4****Table S4. The primers used for real-time quantitative RT-PCR.**

---

|          |                                                                       |
|----------|-----------------------------------------------------------------------|
| MLP43    | F: 5'-GGAAATACGTTTCATGATGGAAA-3'<br>R: 5'-TTGGAGTGTAATGCGAAGC-3'      |
| ABA1     | F: 5'- GACTGGGTCCTTGGAGGTAA-3'<br>R: 5'- CATCGGCTTTGTTCAGTGAGT-3'     |
| ABA2     | F: 5'- TCCAAGCATGCTGTTCTAGG-3'<br>R: 5'- AAATGAGCCAAAGCGAGTTT-3'      |
| ABI1     | F: 5'-AGATGGTCGGTTTGATCCTC-3'<br>R: 5'-AGTTCGCTACCTGAGAACCG-3'        |
| ABI2     | F: 5'-TCAAGATCCATTGGCGATAG-3'<br>R: 5'-CAAATCGCACACTTCTTCGT-3'        |
| DREB2A   | F: 5'-AACCTGTCAGCAACAACAGC-3'<br>R: 5'-AAACACATCGTCGCCATTTA-3'        |
| HAB1     | F: 5'-TCTAGGTCCATCGGTGACAG-3'<br>R: 5'-TTTCGCAGACTTCTTGGTTG-3'        |
| KIN1     | F: 5'-GCAATGTTCTGCTGGACAAG-3'<br>R: 5'-TACACTCTTTCCCGCCTGTT-3'        |
| NCED3    | F: 5'-TTGATGCTCCAGATTGCTTC-3'<br>R: 5'- GGACCCTATCACGACGACTT-3'       |
| RAB18    | F: 5'-AGCTCTAGCTCGGAGGATGA-3'<br>R: 5'-CATGATGACCTGGCAACTTC-3'        |
| RbohD    | F: 5'- AACAAACAGGTGGCTGTTTACC-3'<br>R: 5'-TGTGATTGAGAAAGGATGCC-3'     |
| RbohF    | F: 5'-TTCAGTATCCGTGGGCAATA-3'<br>R: 5'-CACTCCTGCGAAAGATCAAA-3'        |
| RD20     | F: 5'-GGATTTTCGTGACCTTGGTTT-3'<br>R: 5'-TAAACCGGCAATAATGGTGA-3'       |
| RD29A    | F: 5'-AGGAACCACCACTCAACACA-3'<br>R: 5'-GCTCATGCTCATTGCTTTGT-3'        |
| RD29B    | F: 5'-ACGAGCAAGACCCAGAAGTT-3'<br>R: 5'-AGGAACAATCTCCTCCGATG-3'        |
| β-ACTIN8 | F: 5'-AGTGGTCGTACAACCGGTATTGT-3'<br>R: 5'-GAGGATAGCATGTGGAAGTGAGAA-3' |

---

**Table S5**

**Table S5. The detailed list of relative folds alterations with metabolite profiling under control and drought treatment in Col-0, *mlp43* and MLP OE plants. ND: not detected; the values in this table indicate folds changes.**

| Metabolites                   | <i>mlp43</i> -mock<br>vs. Col-mock | <i>OE-2</i> -mock<br>vs. Col- mock | <i>mlp43</i> -Dr.<br>vs. Col-Dr. | <i>OE-2</i> -Dr.<br>vs. Col- Dr. |
|-------------------------------|------------------------------------|------------------------------------|----------------------------------|----------------------------------|
| D-(+)-turanose                | 1.2928                             | -0.6211                            | -1.8467                          | 3.4855                           |
| D-(+)-trehalose               | 1.0295                             | 0.2802                             | -1.8477                          | 6.3784                           |
| Maltose                       | 0.8364                             | 0.1456                             | -5.9036                          | 1.3625                           |
| D-(+)-galactose               | ND                                 | 0.2671                             | -0.6023                          | -1.6630                          |
| D-(+)-cellobiose              | -0.8911                            | 1.5569                             | -0.7989                          | 1.8883                           |
| D-psicose                     | 1.0401                             | -1.4912                            | -0.1577                          | 1.1133                           |
| L-(-)-sorbose                 | -0.4544                            | -2.0302                            | -1.7593                          | 1.0508                           |
| D-galactose                   | 0.9054                             | -0.3398                            | -3.7509                          | 0.3531                           |
| D-glucose                     | -0.9717                            | -0.1240                            | -3.0409                          | 5.1033                           |
| Citrulline                    | 0.2431                             | 0.8408                             | -2.8620                          | 1.5951                           |
| L-glutamine                   | 1.1987                             | 0.1261                             | 0.6324                           | 0.0365                           |
| L-proline                     | 0.2502                             | 1.0781                             | -1.6644                          | 6.4170                           |
| Glycine                       | 0.7501                             | -1.4510                            | ND                               | -1.5561                          |
| L-valine                      | 2.0051                             | -0.9602                            | -0.0952                          | 2.6086                           |
| Serine                        | 0.8712                             | 1.0707                             | -0.3531                          | 1.7107                           |
| L-threonine                   | -1.1230                            | -1.3525                            | -4.6917                          | 1.1523                           |
| L-lysine                      | -0.3012                            | -1.0067                            | -1.4789                          | 2.5674                           |
| L-alanine                     | 0.3577                             | -0.3353                            | -0.0365                          | 11.7320                          |
| Octadecanoic acid             | -0.6841                            | -0.2986                            | -1.7069                          | 8.6853                           |
| Phosphoric acid               | -0.5602                            | -1.1020                            | 0.7954                           | 6.9419                           |
| Cinnamic acid                 | -1.6764                            | -1.1612                            | -2.0426                          | -1.0335                          |
| Hexadecanoic acid             | 0.2310                             | 0.1310                             | 2.8620                           | 4.1404                           |
| 2-ketoglutaric acid           | 0.4697                             | 0.1804                             | -0.6323                          | 1.2358                           |
| Glutamic acid                 | 0.9325                             | -2.9988                            | 1.0196                           | -1.6766                          |
| 2-butenedioic acid            | 1.0971                             | 1.510                              | -5.7361                          | -0.5126                          |
| Propanoic acid                | -0.0897                            | -0.5095                            | -0.6048                          | -1.3319                          |
| Ethanimidic acid              | 1.7649                             | -0.3303                            | -1.2312                          | 2.6713                           |
| Galactinol                    | 0.1409                             | -0.3133                            | 1.8476                           | 2.4783                           |
| $\alpha$ -D-galactopyranoside | -0.1335                            | -0.0031                            | 0.6023                           | -1.9018                          |
| Myo-Inositol                  | -0.0341                            | -0.2187                            | 1.7593                           | 2.1501                           |
| Androst-2-en-17-amine         | 0.2022                             | -0.3458                            | 3.1459                           | 3.2062                           |
| Glycerol                      | -1.8229                            | -0.6387                            | -0.0983                          | 0.8192                           |
| Borane                        | -0.3663                            | 0.2110                             | 0.3617                           | -1.6835                          |
| Ethylene glycol               | 1.1731                             | 0.8680                             | 0.5168                           | 1.6064                           |
